# Supplementary material
Source: publisher site journal article supplement (https://www.spandidos-publications.com/568/downloadSupplementary)
Supplement: Supplementary file 1 [file downloadSupplementary]

Figure S1. High FGFR3 expression is associated with poor NB survival and NB cell lines are dependent on FGFR3 for growth. (A) Kaplan-Meier curves of event-free and overall survival for high/low FGFR3 mRNA expression from a public NB expression cohort (Kosac, n=649). The cut-off between high and low expression was set at the last quartile. P-values were obtained by one-way ANOVA with Bonferroni post-hoc test. Data from R2: Microarray analysis and visualization platform (<http://r2.amc.nl>) (B) Genome-scale RNAi screening showing dependency of FGFR3 knockdown in cell lines from different cancer diagnoses. For enriched diagnoses two-group comparisons were made across genes using parametric empirical Bayes methods to assess the significance of the observed differences between groups. P-values for each gene were calculated by empirical Bayes moderated t-statistics. Data were retrieved from <http://depmap.org>. NB, neuroblastoma; FGFR3, fibroblast growth factor receptor 3.

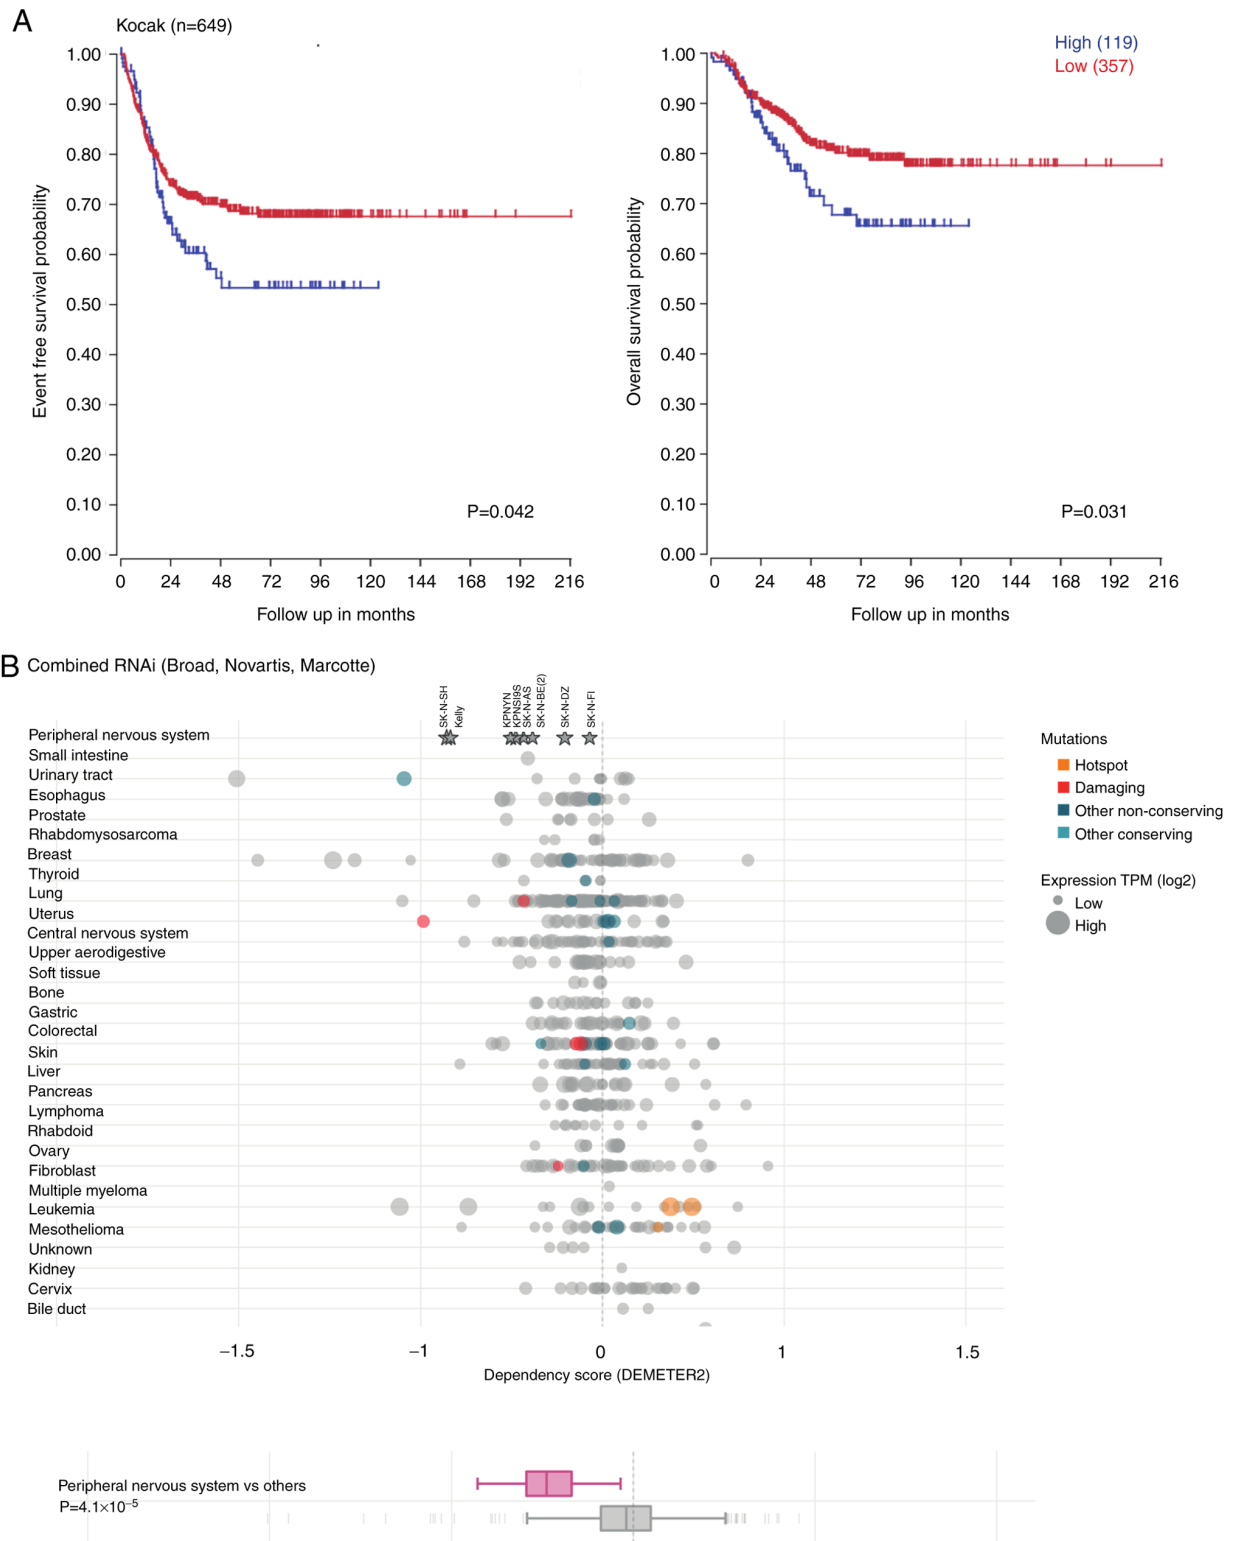

Figure S2. Protein expression of PI3K and FGFR3 in NB cell lines. Western blot analysis showing PI3K p110 $\alpha$  (110 kDa), FGFR3 (88 kDa) and loading control GAPDH (36 kDa) protein expression in NB cell lines SK-N-SH, SK-N-FI, SK-N-BE(2)-C and SK-N-AS and in tonsillar and base of tongue cancer cell lines UPCI-SCC-154 and UT-SCC-60A (included as positive controls). NB, neuroblastoma; FGFR3, fibroblast growth factor receptor 3.

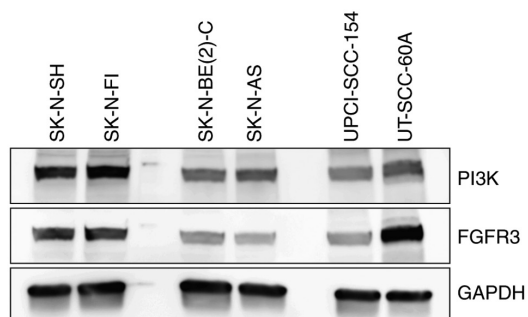

Figure S3. Representative images of wells of the most sensitive (SK-N-SH) and most resistant (SK-N-FI) cell line 72 h after the single and combination treatment. Images in A-a and B-a show the growth of the SK-N-SH and SK-N-FI cell lines without any drug treatment. The effects of various AZD4547 concentrations are shown: For the SK-N-SH cells in the images A-b (5  $\mu$ M), A-c (10  $\mu$ M), A-d (25  $\mu$ M) and for the SK-N-FI cells in B-b (5  $\mu$ M), B-c (10  $\mu$ M), B-d (25  $\mu$ M). The effects of BEZ235 are shown for the SK-N-SH cells in the images A-e (0.25  $\mu$ M), A-f (0.5  $\mu$ M), A-g (1  $\mu$ M), A-h (5  $\mu$ M) and for the SK-N-FI cells in B-e (0.25  $\mu$ M), B-f (0.5  $\mu$ M), B-g (1  $\mu$ M), B-h (5  $\mu$ M). The images of the effects of the other PI3K inhibitor, BKM120, for the SK-N-SH cells are shown in A-i (0.25  $\mu$ M), A-j (0.5  $\mu$ M), A-k (1  $\mu$ M), A-l (5  $\mu$ M), and for the SK-N-FI cells in B-i (0.25  $\mu$ M), B-j (0.5  $\mu$ M), B-k (1  $\mu$ M), B-l (5  $\mu$ M). The effects of the representative combination treatment are shown for the SK-N-SH cells in A-m (AZD4547 5  $\mu$ M, BEZ235 0.25  $\mu$ M), A-n (AZD4547 10  $\mu$ M, BEZ235 0.5  $\mu$ M) and A-o (AZD4547 25  $\mu$ M, BEZ235 1  $\mu$ M), and for the SK-N-FI cells in B-m (AZD4547 5  $\mu$ M, BEZ235 0.25  $\mu$ M), B-n (AZD4547 10  $\mu$ M, BEZ235 0.5  $\mu$ M) and B-o (AZD4547 25  $\mu$ M, BEZ235 1  $\mu$ M).

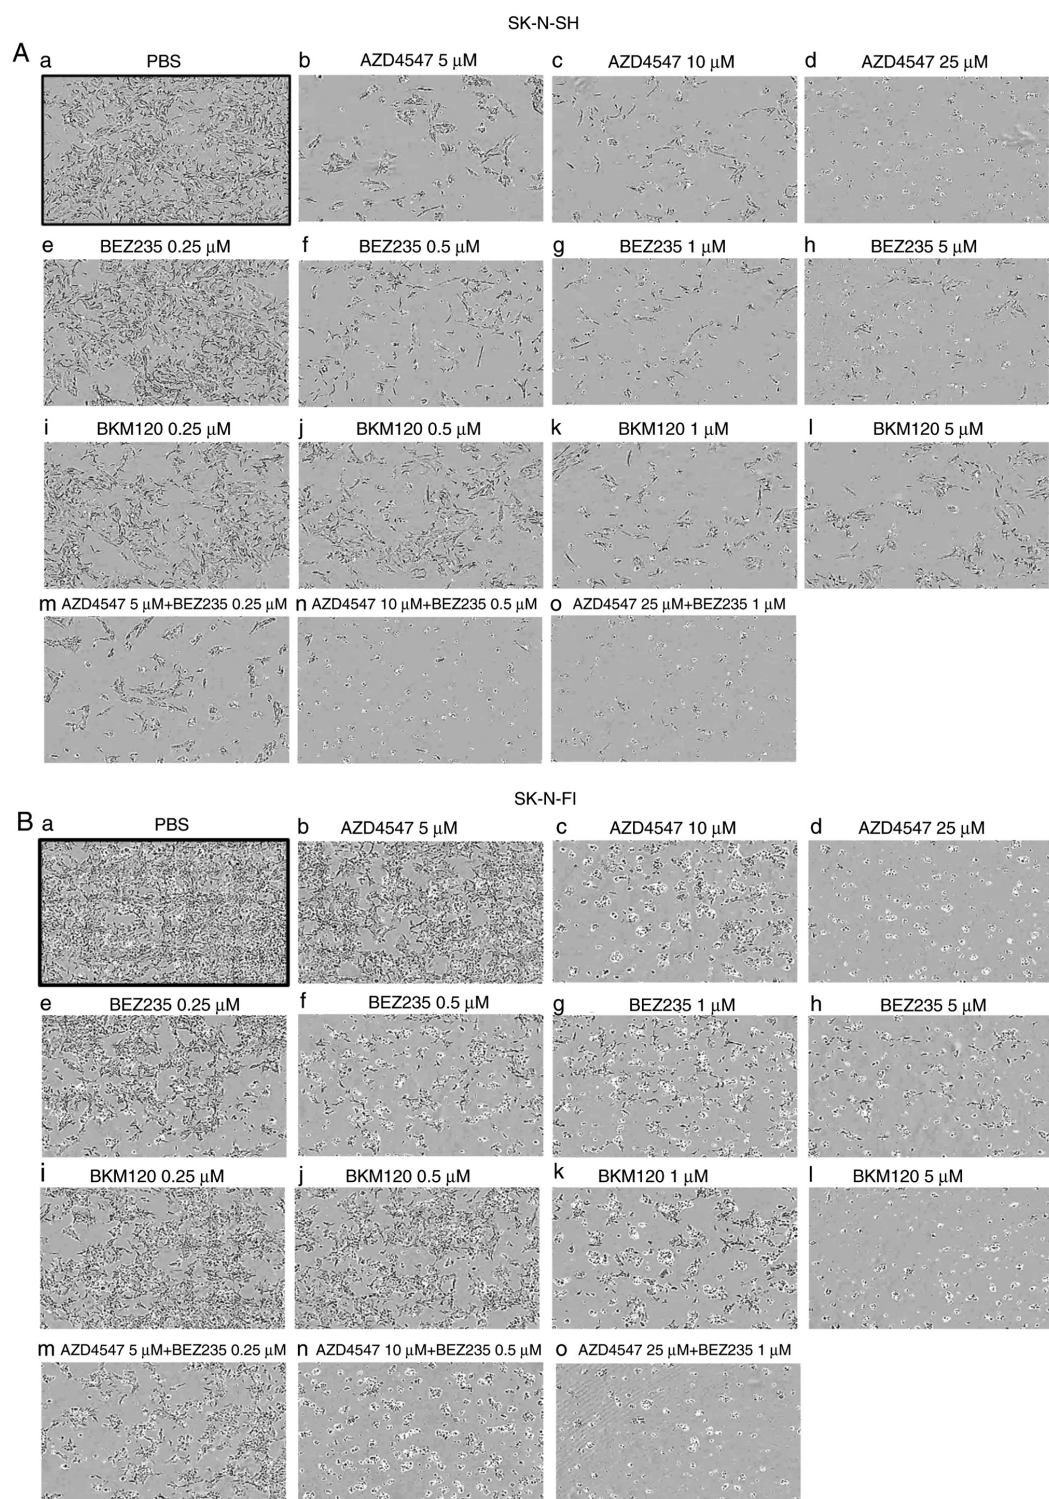

Table SI. Concentrations of FGFR and PI3K inhibitors used for the combination experiments.

| Combinations of the FGFR (AZD4547)<br>and PI3K (BEZ235) inhibitors used |                   |
|-------------------------------------------------------------------------|-------------------|
| AZD4547 ( $\mu$ M)                                                      | BEZ235 ( $\mu$ M) |
| 5                                                                       | 0.25              |
| 10                                                                      | 0.25              |
| 5                                                                       | 0.5               |
| 10                                                                      | 0.5               |
| 5                                                                       | 1                 |
| 10                                                                      | 1                 |
| 25                                                                      | 1                 |
| 10                                                                      | 5                 |
| <i>FGFR3</i> , fibroblast growth factor receptor 3.                     |                   |
